# Supplementary material for: Cooperative B-site octahedral tilting, distortion and A-site conformational change induced phase transitions of a 2D lead halide perovskite
Source: Royal Society of Chemistry journal article supplement (doi:10.1039/d1qm00566a), 2021-01-01
Supplement: d1qm00566a1.pdf [file d1qm00566a1.pdf]

## Supporting information

### **Cooperative B-site octahedral tilting, distortion and A-site conformational change induced phase transition of 2D Lead Halide Perovskite**

Muhammad Azeem,<sup>a</sup> Yan Qin,<sup>b</sup> Zhi-Gang Li,<sup>a</sup> Wei Li,<sup>\*a</sup>

a. School of Materials Science and Engineering, Nankai University, Tianjin 300350, China

b. School of Physics and Wuhan National Laboratory for Optoelectronics, Huazhong University of Science and Technology, Wuhan 430074, China

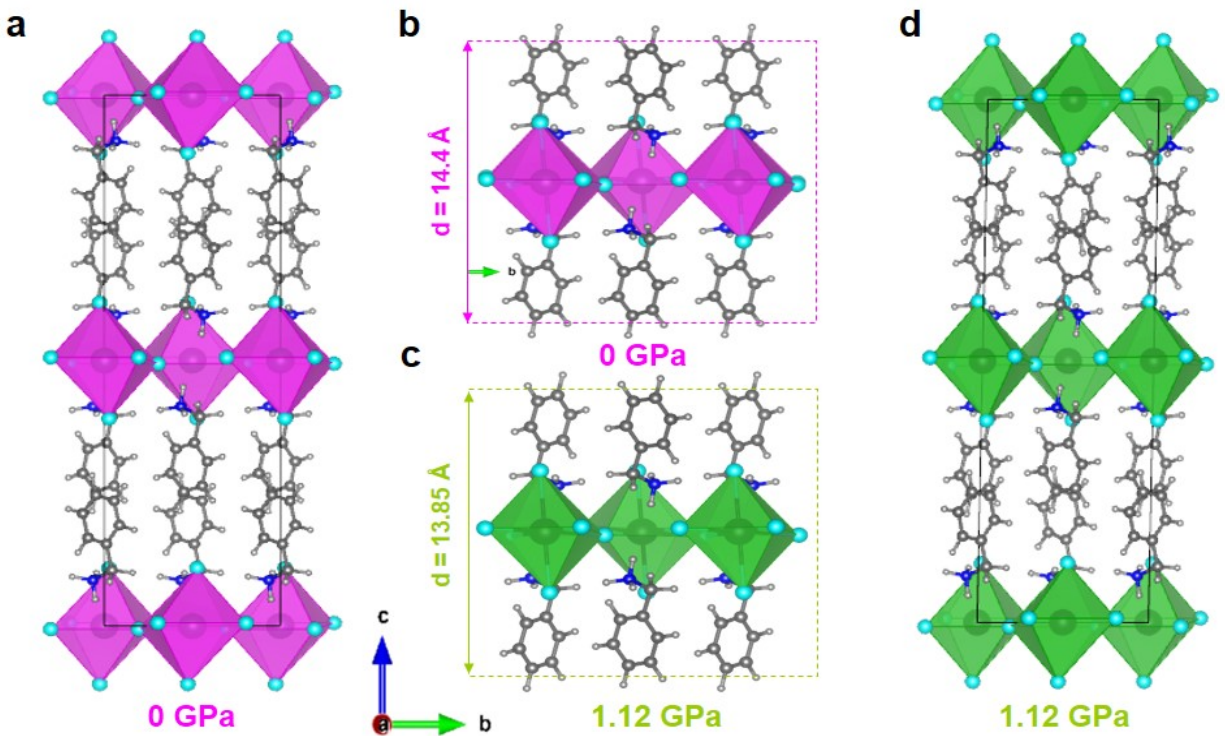

**Fig. S1.** Structure and layer thickness of  $(\text{BA})_2\text{PbI}_4$  at low pressure phase (pink octahedra at 0 GPa) and at high pressure phase (green octahedra at 1.12 GPa). (a, d) Inorganic layer sandwich between two organic layers stacked along  $c$ -axis in a unit cell. (b, c) The layer thickness is about 14.4 Å at 0 GPa, and 13.85 Å at 1.12 GPa.

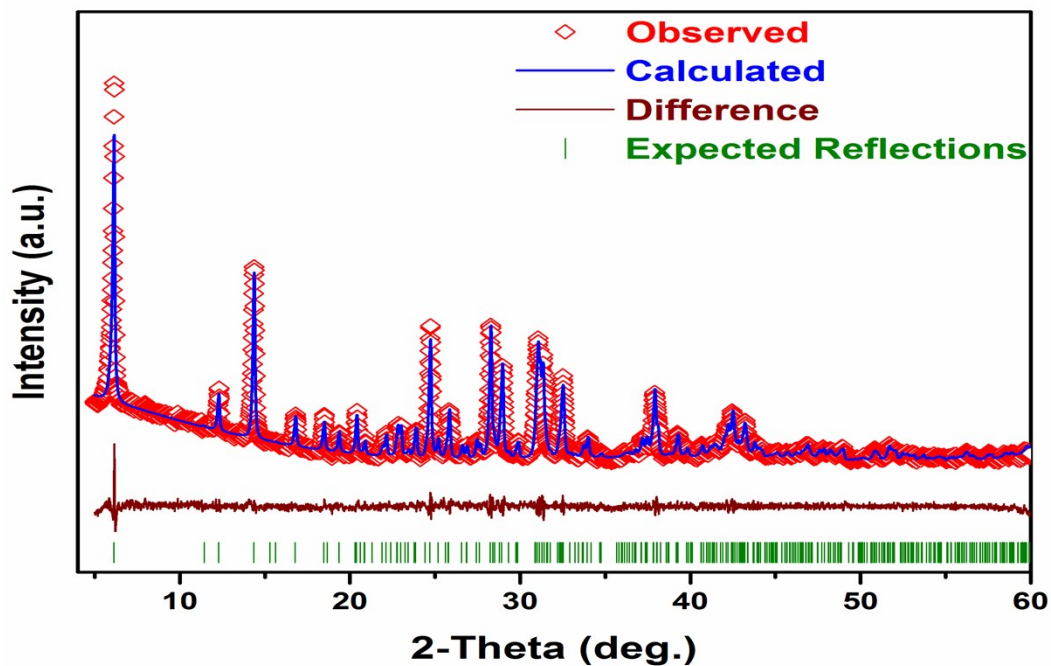

**Fig. S2.** Le-Bail refinements of  $(\text{BA})_2\text{PbI}_4$  at ambient pressure in Phase-I (orthorhombic "Pbca").

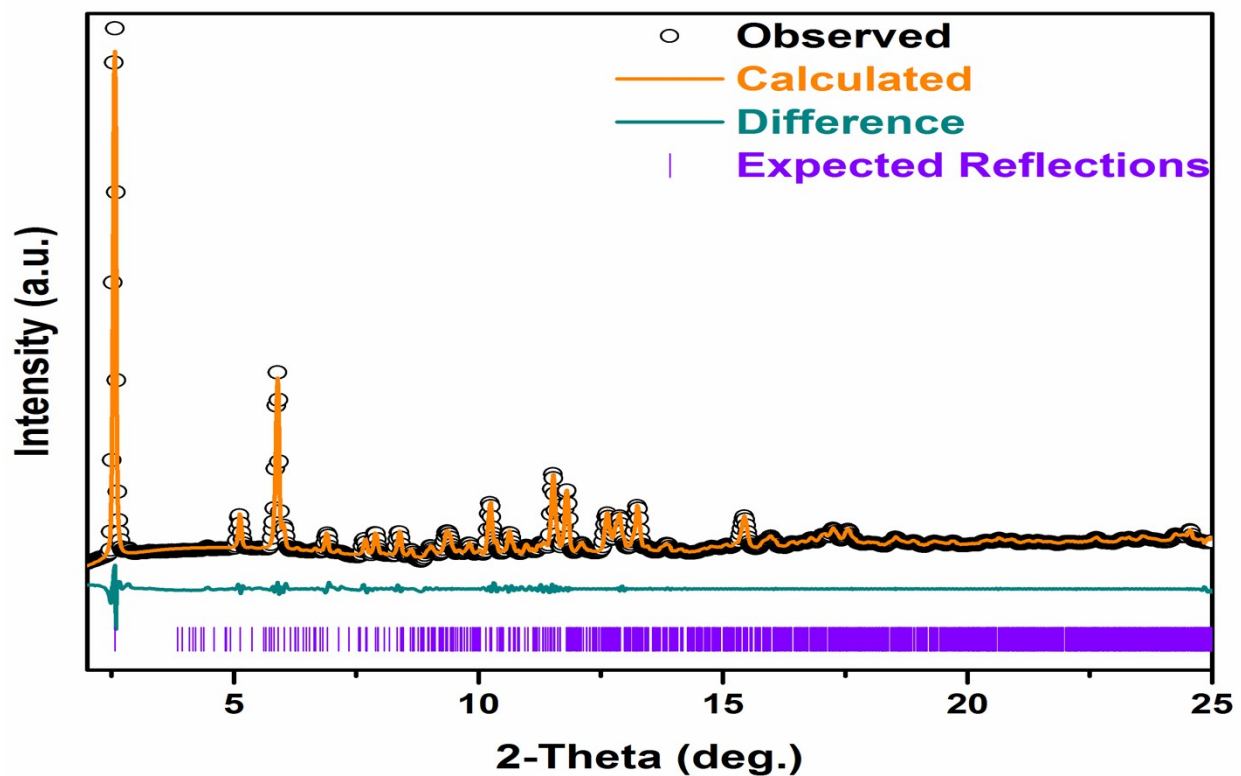

Fig. S3. Le-Bail refinements of  $(\text{BA})_2\text{PbI}_4$  at 1.12 GPa pressure in Phase-II (triclinic “ $P-I$ ”).

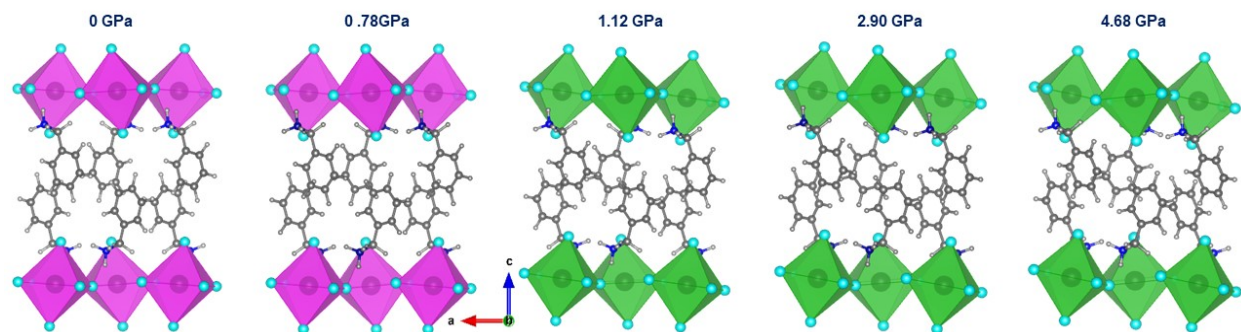

Fig. S4. The molecular structure of  $(\text{BA})_2\text{PbI}_4$ , the conformation of BA cations, and  $(\text{PbI}_4)^{2-}$  inorganic unit in  $ac$ -direction at different pressures.

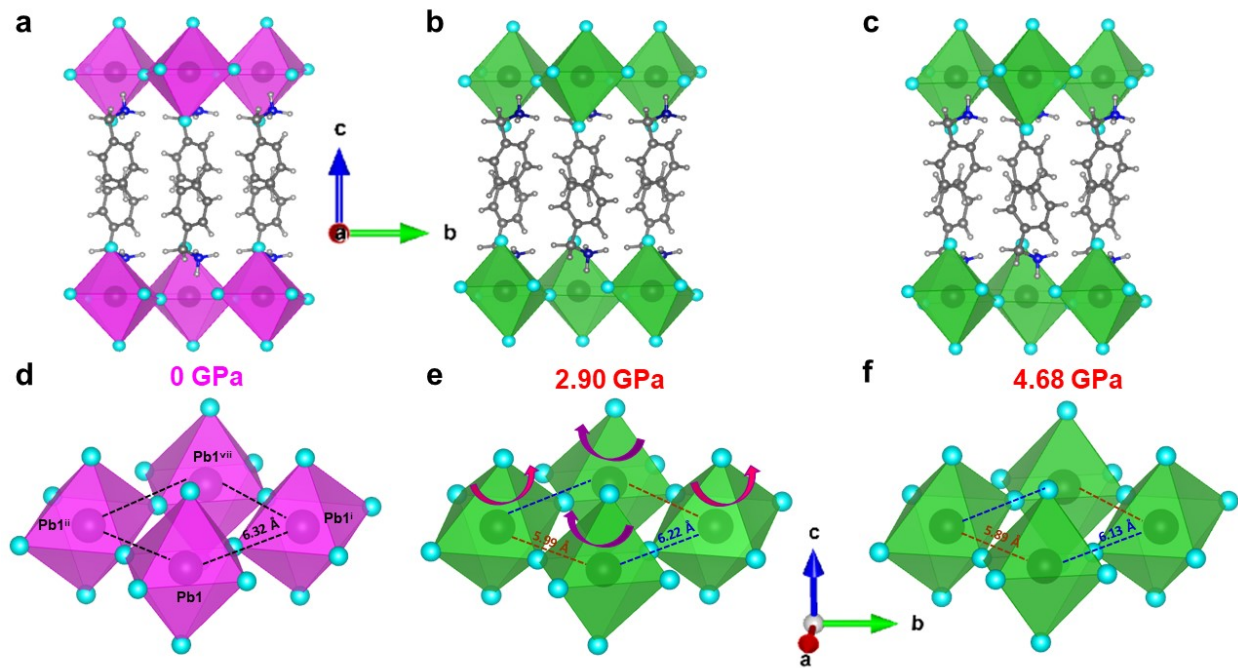

**Fig. S5.** The structure of  $(\text{BA})_2\text{PbI}_4$ , the conformation of BA cations, and  $(\text{PbI}_4)^{2-}$  inorganic unit, at 0 GPa [a and d], 2.9 GPa [b and e], and 4.68 GPa [c and f], while [a-c] are in *bc*-direction showing layer stacking, while [d-f] indicating  $\text{PbI}_6$  octahedra at unit cell edges with distortion in different directions. Obtained by experiment-aided DFT calculations. Symmetry codes: (i)  $0.5-x, -y, 0.5+z$ ; (ii)  $0.5-x, 1-y, 0.5+z$ ; (iii)  $-0.5+x, y, 1.5-z$ ; (iv)  $x, 0.5-y, 0.5+z$ ; (v)  $0.5+x, y, 1.5-z$ ; (vi)  $-x, -0.5+y, 1.5-z$ ; (vii)  $1-x, 0.5+y, 1.5-z$ .

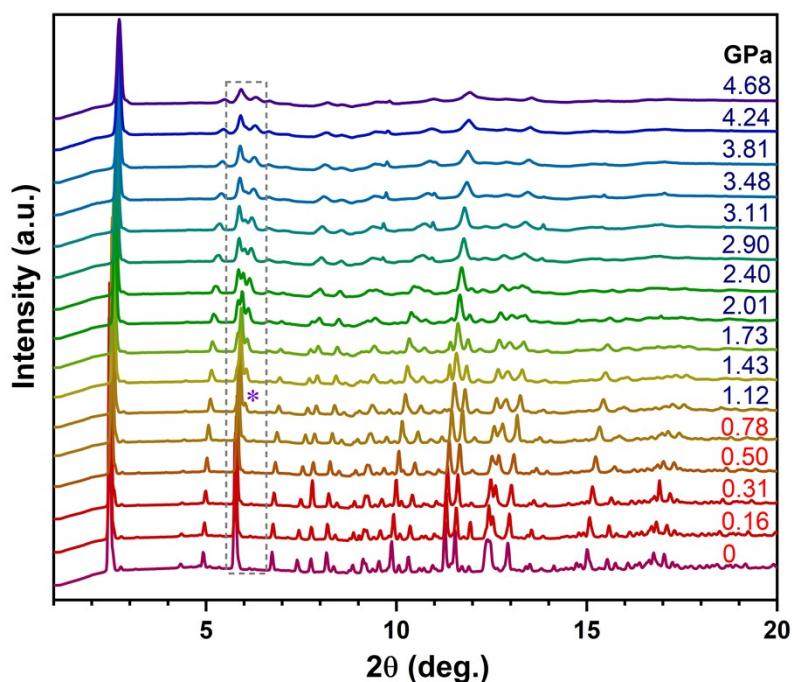

**Fig. S6.** High-pressure evolution of  $(\text{BA})_2\text{PbI}_4$  single crystal. XRD patterns from ambient to 4.68 GPa. XRD patterns of Phase-I and Phase-II with a new peak at about  $6.02^\circ$ .

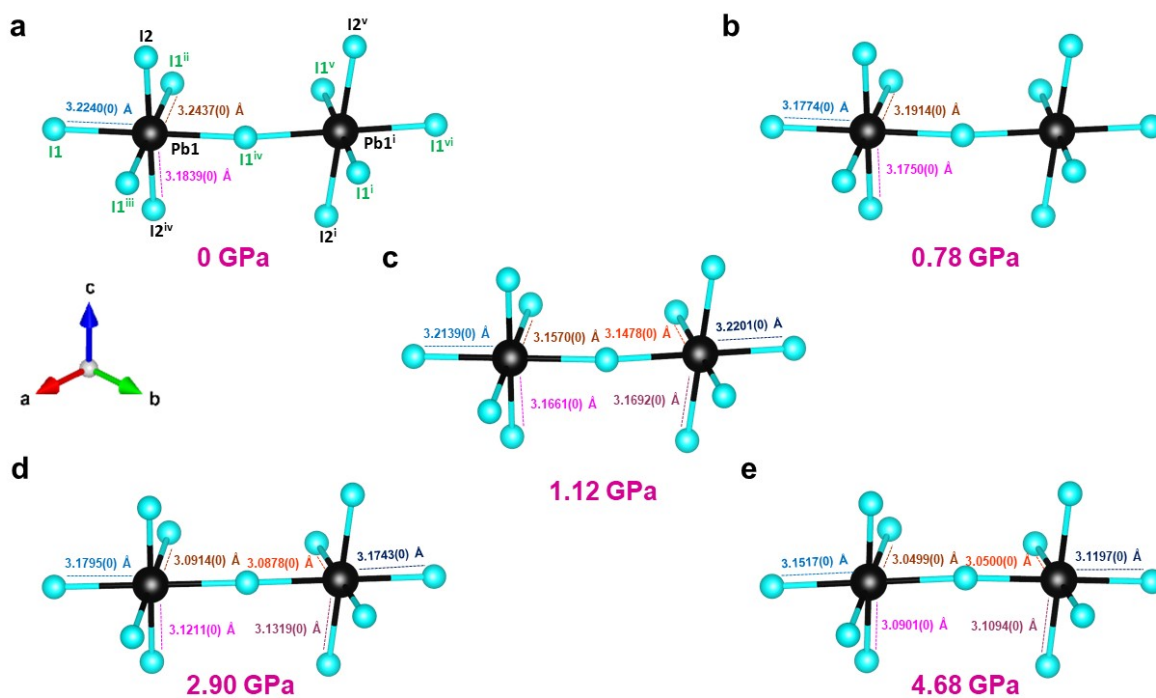

**Fig. S7.** The bond lengths within the two adjacent  $\text{PbI}_6$  octahedra at different pressure at; (a) 0 GPa (b) 0.78 GPa (c) 1.12 GPa, (d) 2.90 GPa, and (e) 4.68 GPa, obtained by experiment-aided DFT calculations. Symmetry codes: (i)  $0.5-x, -y, 0.5+z$ ; (ii)  $0.5-x, 1-y, 0.5+z$ ; (iii)  $-0.5+x, y, 1.5-z$ ; (iv)  $x, 0.5-y, 0.5+z$ ; (v)  $0.5+x, y, 1.5-z$ ; (vi)  $-x, -0.5+y, 1.5-z$ ; (vii)  $1-x, 0.5+y, 1.5-z$ .

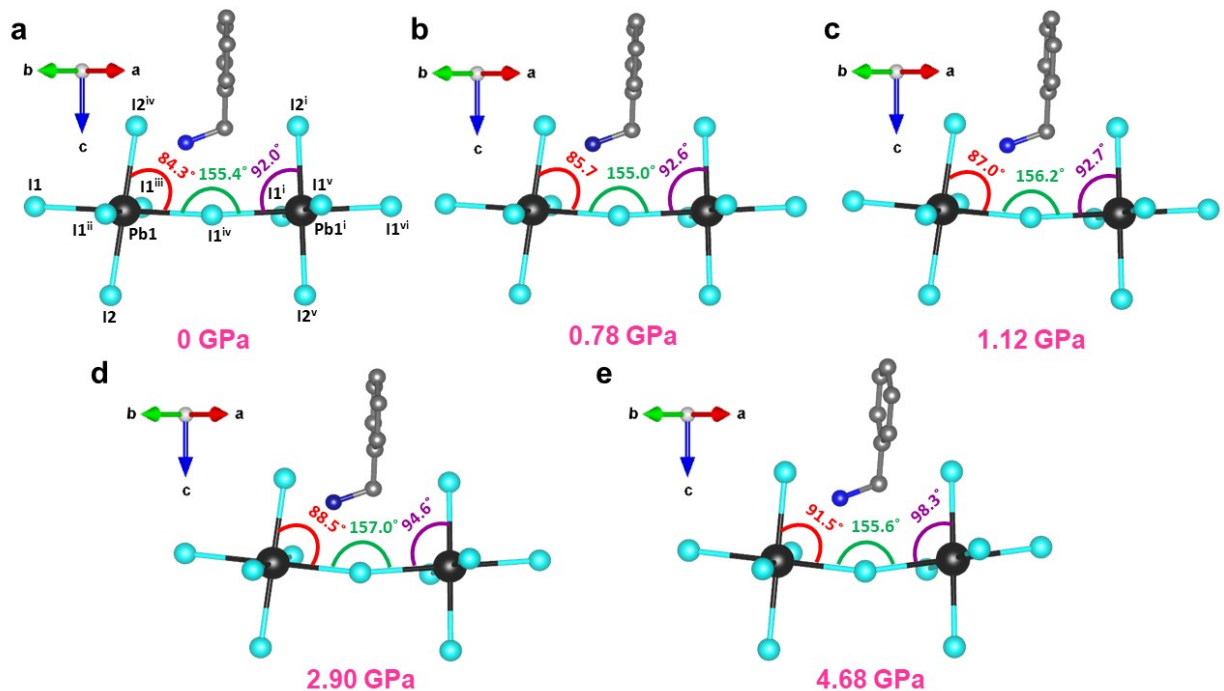

**Fig. S8.** The tilting of two adjacent  $\text{PbI}_6$  octahedra under different pressure. Symmetry codes: (i)  $0.5-x, -y, 0.5+z$ ; (ii)  $0.5-x, 1-y, 0.5+z$ ; (iii)  $-0.5+x, y, 1.5-z$ ; (iv)  $x, 0.5-y, 0.5+z$ ; (v)  $0.5+x, y, 1.5-z$ ; (vi)  $-x, -0.5+y, 1.5-z$ ; (vii)  $1-x, 0.5+y, 1.5-z$ .

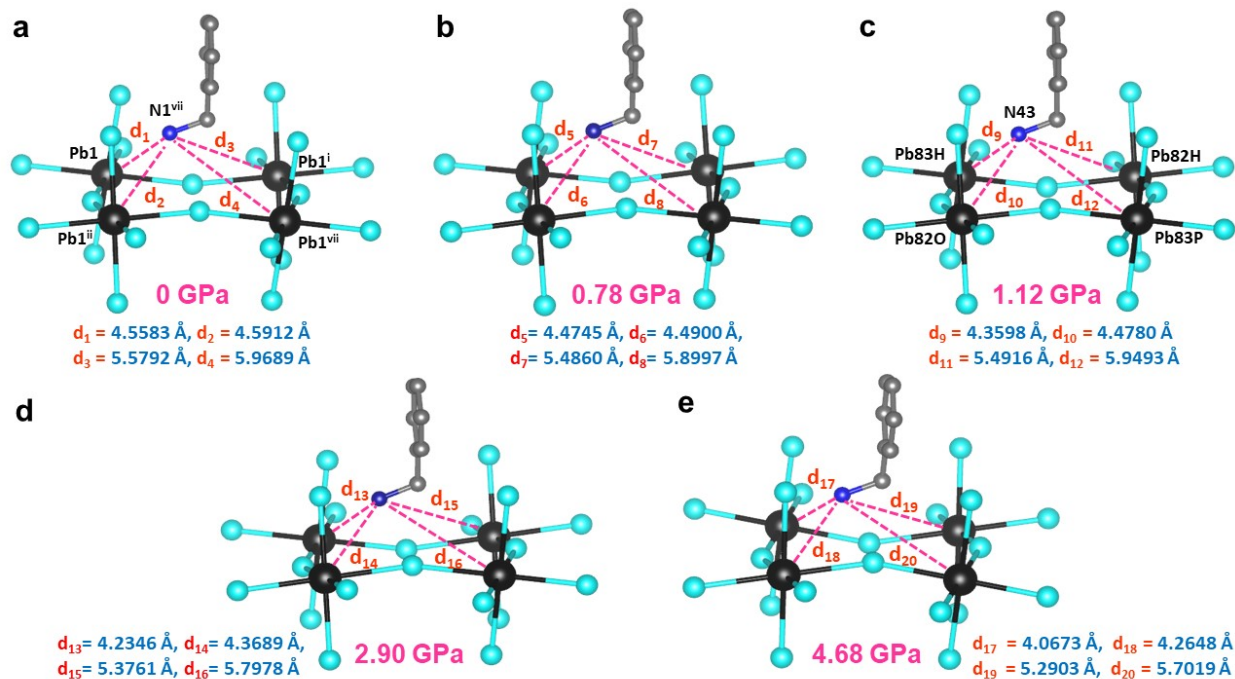

**Fig. S9.** The distance of nitrogen atom from Pb atoms at; (a) 0 GPa (b) 0.78 GPa (c) 1.12 GPa, (d) 2.90 GPa, and (e) 4.68 GPa. Symmetry codes: (i)  $0.5-x, -y, 0.5+z$ ; (ii)  $0.5-x, 1-y, 0.5+z$ ; (iii)  $-0.5+x, y, 1.5-z$ ; (iv)  $x, 0.5-y, 0.5+z$ ; (v)  $0.5+x, y, 1.5-z$ ; (vi)  $-x, -0.5+y, 1.5-z$ ; (vii)  $1-x, 0.5+y, 1.5-z$ .

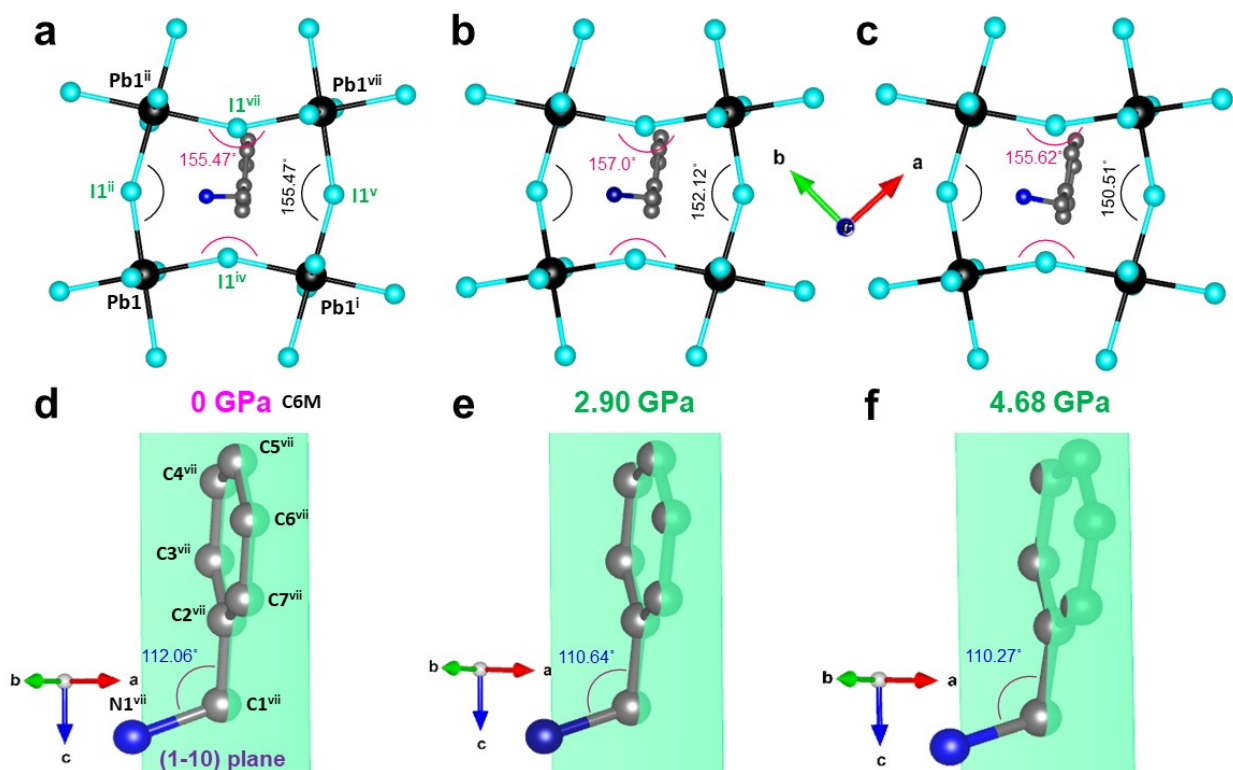

**Fig. S10.** The tilting distortion of  $\text{PbI}_6$  octahedra and configurational changes in of BA cation at 0.78 GPa (a), and at 2.9 GPa (b) obtained by experiment-aided DFT calculations. Hydrogen atoms are removed for clarity. Symmetry codes: (i)  $0.5-x, -y, 0.5+z$ ; (ii)  $0.5-x, 1-y, 0.5+z$ ; (iii)  $-0.5+x, y, 1.5-z$ ; (iv)  $x, 0.5-y, 0.5+z$ ; (v)  $0.5+x, y, 1.5-z$ ; (vi)  $-x, -0.5+y, 1.5-z$ ; (vii)  $1-x, 0.5+y, 1.5-z$ .

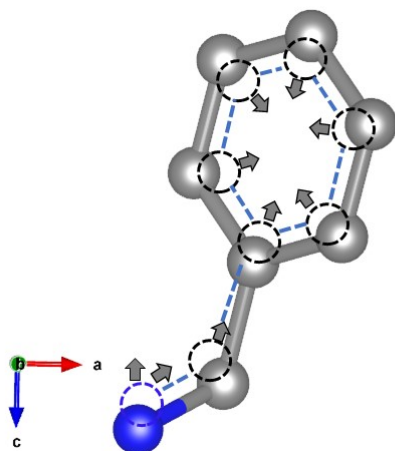

**Fig. S11.** General configurational behavior in of  $\text{BA}^+$  cation under pressure. Hydrogen atoms are removed for clarity

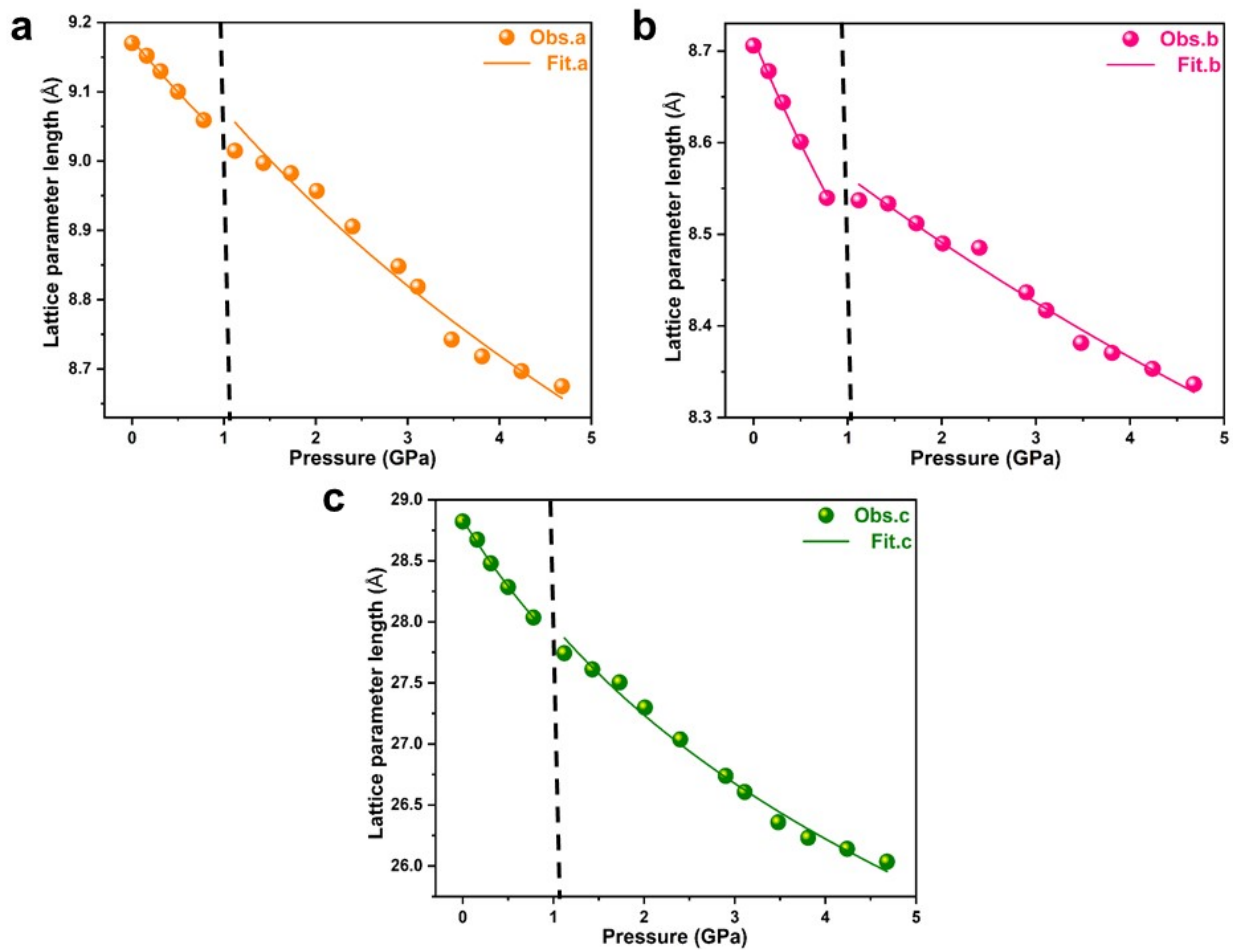

**Fig. S12.** The evolution of lattice parameters as a function of pressure, fitted by Second-order Birch-Murnaghan EoS using PASCAL software. (a) Lattice parameter 'a' (b) lattice parameter 'b' (c) lattice parameter 'c'.



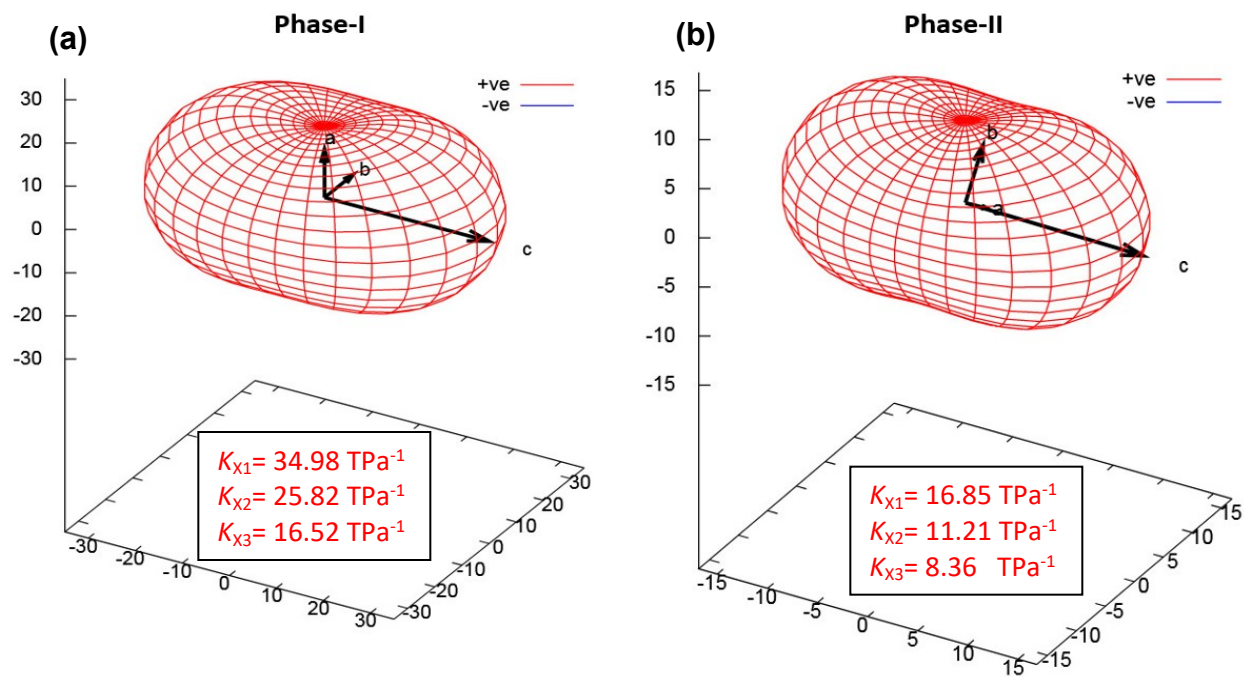

**Fig. S13.** The linear compressibility indicatrices along three orthogonal directions for two phases.

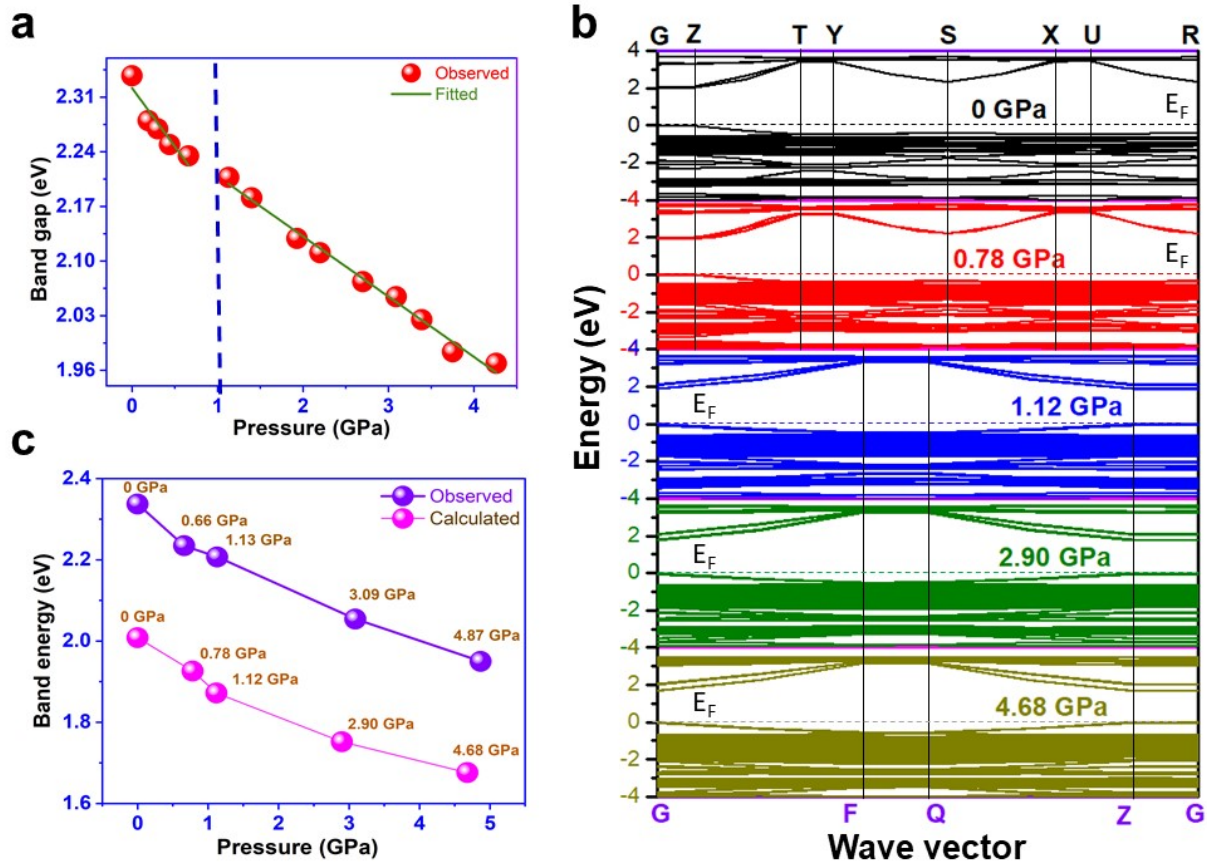

**Fig. S14.** The band energy behavior as a function of pressure (compression) (a) Band energy reduction under pressure. (b) Band energy comparison at different pressures (observed and calculated). (c) Band energy calculations via DFT at different pressures.

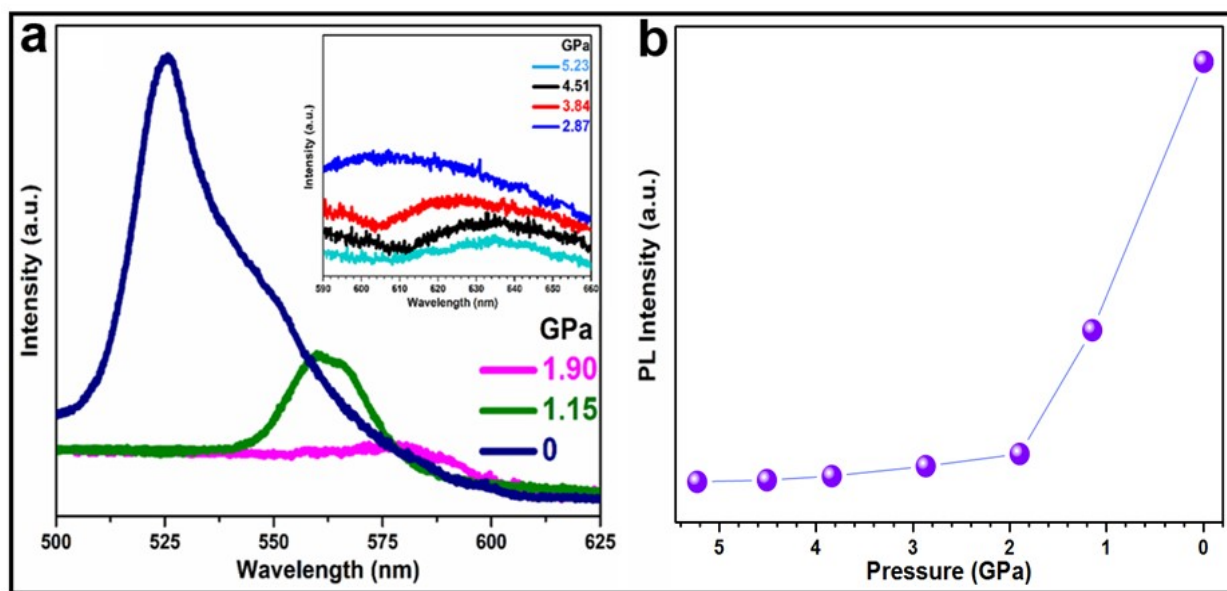

**Fig. S15.** The PL behavior as a function of pressure (decompression) (a) PL spectra (1.90 GPa  $\rightarrow$  0 GPa), inset showed the recovery of enhanced nonradioactive process induced by amorphization (5.23  $\rightarrow$  2.87 GPa). (b) PL intensity evolution with decompression.

**Table S1.** Calculated bond lengths and angles for  $\text{PbI}_6$  octahedra at different pressures in Phase-I and Phase-II. Symmetry codes: Symmetry codes: (i) 0.5-x, -y, 0.5+z; (ii) 0.5-x, 1-y, 0.5+z; (iii) -0.5+x, y, 1.5-z; (iv) x, 0.5-y, 0.5+z; (v) 0.5+x, y, 1.5-z; (vi) -x, -0.5+y, 1.5-z; (vii) 1-x, 0.5+y, 1.5-z.

| Distance                              | Phase-I |          | Phase-II |          |          |
|---------------------------------------|---------|----------|----------|----------|----------|
|                                       | 0 GPa   | 0.78 GPa | 1.12 GPa | 2.90 GPa | 4.68 GPa |
| (Å)                                   |         |          |          |          |          |
| Pb1-I2 <sup>iv</sup>                  | 3.1814  | 3.1750   | 3.1692   | 3.1319   | 3.1095   |
| Pb1-I1 <sup>iv</sup>                  | 3.2437  | 3.1915   | 3.2201   | 3.1744   | 3.1197   |
| Pb1-I1 <sup>ii</sup>                  | 3.2241  | 3.1775   | 3.1478   | 3.0879   | 3.0500   |
| Pb1-I2                                | 3.1814  | 3.1750   | 3.1692   | 3.1319   | 3.1095   |
| Pb1-I1                                | 3.2437  | 3.1915   | 3.2201   | 3.1744   | 3.1197   |
| Pb1-I1 <sup>iii</sup>                 | 3.2241  | 3.1775   | 3.1478   | 3.0879   | 3.0500   |
| Pb1 <sup>i</sup> -I2 <sup>i</sup>     | 3.1814  | 3.1750   | 3.1661   | 3.1212   | 3.0901   |
| Pb1 <sup>i</sup> -I1 <sup>iv</sup>    | 3.2241  | 3.1775   | 3.2139   | 3.1795   | 3.1517   |
| Pb1 <sup>i</sup> -I1 <sup>v</sup>     | 3.2437  | 3.1915   | 3.1570   | 3.0914   | 3.0500   |
| Pb1 <sup>i</sup> -I2 <sup>v</sup>     | 3.1814  | 3.1750   | 3.1661   | 3.1212   | 3.0901   |
| Pb1 <sup>i</sup> -I1 <sup>vi</sup>    | 3.2241  | 3.1775   | 3.2139   | 3.1795   | 3.1517   |
| Pb1 <sup>i</sup> -I1 <sup>i</sup>     | 3.2437  | 3.1915   | 3.1570   | 3.0914   | 3.0500   |
| Pb1-Pb1 <sup>i</sup>                  | 6.3202  | 6.2182   | 6.2959   | 6.2264   | 6.1301   |
| Pb1 <sup>i</sup> -Pb1 <sup>vii</sup>  | 6.3202  | 6.2182   | 6.1186   | 5.9973   | 5.8991   |
| Pb1 <sup>vii</sup> -Pb1 <sup>ii</sup> | 6.3202  | 6.2182   | 6.2959   | 6.2264   | 6.1301   |
| Pb1 <sup>ii</sup> -Pb1                | 6.3202  | 6.2182   | 6.1186   | 5.9973   | 5.8991   |

| Angle<br>(°)                                                                   | Phase-I |          | Phase-II |          |          |
|--------------------------------------------------------------------------------|---------|----------|----------|----------|----------|
|                                                                                | 0 GPa   | 0.78 GPa | 1.12 GPa | 2.90 GPa | 4.68 GPa |
| $\angle \text{Pb1-I1}^{\text{iv}}-\text{Pb1}^{\text{i}}$                       | 155.473 | 155.020  | 156.213  | 157.008  | 155.623  |
| $\angle \text{Pb1-I1}^{\text{ii}}-\text{Pb1}^{\text{ii}}$                      | 155.473 | 155.020  | 152.075  | 152.117  | 150.510  |
| $\angle \text{Pb1}^{\text{ii}}-\text{I1}^{\text{vii}}-\text{Pb1}^{\text{vii}}$ | 155.473 | 155.020  | 156.213  | 157.008  | 155.623  |
| $\angle \text{Pb1}^{\text{vii}}-\text{I1}^{\text{v}}-\text{Pb1}^{\text{i}}$    | 155.473 | 155.020  | 152.075  | 152.117  | 150.510  |
| $\angle \text{I2}^{\text{iv}}-\text{Pb1}-\text{I1}^{\text{iv}}$                | 84.306  | 85.772   | 87.097   | 88.566   | 91.496   |
| $\angle \text{I2}^{\text{iv}}-\text{Pb1}-\text{I1}^{\text{ii}}$                | 92.053  | 92.626   | 94.608   | 95.551   | 95.910   |
| $\angle \text{I2}^{\text{i}}-\text{Pb1}^{\text{i}}-\text{I1}^{\text{iv}}$      | 92.053  | 92.626   | 92.724   | 94.598   | 98.290   |
| $\angle \text{I2}^{\text{i}}-\text{Pb1}^{\text{i}}-\text{I1}^{\text{v}}$       | 95.694  | 94.228   | 94.581   | 92.861   | 90.913   |
| $\angle \text{I1}^{\text{ii}}-\text{Pb1}-\text{I1}^{\text{iv}}$                | 86.915  | 86.450   | 88.831   | 89.467   | 90.649   |
| $\angle \text{I1}^{\text{iv}}-\text{Pb1}^{\text{i}}-\text{I1}^{\text{v}}$      | 93.085  | 93.550   | 95.715   | 95.856   | 96.759   |

**Table S2.** Calculated bond lengths and angles for BA cation at different pressures in Phase-I and Phase-II. Symmetry codes: (i) 0.5-x, -y, 0.5+z; (ii) 0.5-x, 1-y, 0.5+z; (iii) -0.5+x, y, 1.5-z; (iv) x, 0.5-y, 0.5+z; (v) 0.5+x, y, 1.5-z; (vi) -x, -0.5+y, 1.5-z; (vii) 1-x, 0.5+y, 1.5-z.

| Distance                                                 | Phase-I |          | Phase-II |          |          |
|----------------------------------------------------------|---------|----------|----------|----------|----------|
|                                                          | 0 GPa   | 0.78 GPa | 1.12 GPa | 2.90 GPa | 4.68 GPa |
| (Å)                                                      |         |          |          |          |          |
| N1 <sup>vii</sup> -C1 <sup>vii</sup>                     | 1.4831  | 1.4807   | 1.4802   | 1.4767   | 1.4721   |
| C1 <sup>vii</sup> -C2 <sup>vii</sup>                     | 1.4857  | 1.4842   | 1.4837   | 1.4805   | 1.4780   |
| C2 <sup>vii</sup> -C3 <sup>vii</sup>                     | 1.3875  | 1.3869   | 1.3870   | 1.3863   | 1.3844   |
| C3 <sup>vii</sup> -C4 <sup>vii</sup>                     | 1.3833  | 1.3831   | 1.3834   | 1.3823   | 1.3811   |
| C4 <sup>vii</sup> -C5 <sup>vii</sup>                     | 1.3835  | 1.3825   | 1.3827   | 1.3815   | 1.3811   |
| C5 <sup>vii</sup> -C6 <sup>vii</sup>                     | 1.3845  | 1.3843   | 1.3843   | 1.3825   | 1.3819   |
| C6 <sup>vii</sup> -C7 <sup>vii</sup>                     | 1.3821  | 1.3811   | 1.3813   | 1.3797   | 1.3782   |
| C7 <sup>vii</sup> -C1 <sup>vii</sup>                     | 1.3885  | 1.3887   | 1.3887   | 1.3879   | 1.3870   |
|                                                          | Phase-I |          | Phase-II |          |          |
|                                                          | 0 GPa   | 0.78 GPa | 1.12 GPa | 2.90 GPa | 4.68 GPa |
| (°)                                                      |         |          |          |          |          |
| ∠N1 <sup>vii</sup> -C1 <sup>vii</sup> -C2 <sup>vii</sup> | 112.060 | 111.842  | 111.580  | 110.637  | 110.271  |
| ∠C3 <sup>vii</sup> -C2 <sup>vii</sup> -C7 <sup>vii</sup> | 119.225 | 119.340  | 119.478  | 119.626  | 119.814  |
| ∠C4 <sup>vii</sup> -C5 <sup>vii</sup> -C6 <sup>vii</sup> | 120.121 | 120.267  | 120.367  | 120.511  | 120.555  |

**Table S3.** Calculated distances for nitrogen atom at different pressures in Phase-I and Phase-II. Symmetry codes: (i) 0.5-x, -y, 0.5+z; (ii) 0.5-x, 1-y, 0.5+z; (iii) -0.5+x, y, 1.5-z; (iv) x, 0.5-y, 0.5+z; (v) 0.5+x, y, 1.5-z; (vi) -x, -0.5+y, 1.5-z; (vii) 1-x, 0.5+y, 1.5-z.

| Distance                              | Phase-I |          | Phase-II |          |          |
|---------------------------------------|---------|----------|----------|----------|----------|
|                                       | 0 GPa   | 0.78 GPa | 1.12 GPa | 2.90 GPa | 4.68 GPa |
| (Å)                                   |         |          |          |          |          |
| N1 <sup>vii</sup> -I1 <sup>iv</sup>   | 3.6423  | 3.5984   | 3.5510   | 3.5064   | 3.4787   |
| N1 <sup>vii</sup> -I1 <sup>ii</sup>   | 3.8923  | 3.8301   | 3.8535   | 3.7741   | 3.6714   |
| N1 <sup>vii</sup> -I1 <sup>v</sup>    | 5.3427  | 5.2603   | 5.3918   | 5.2157   | 5.1614   |
| N1 <sup>vii</sup> -I1 <sup>vii</sup>  | 3.6872  | 3.6093   | 3.6218   | 3.4871   | 3.3738   |
| N1 <sup>vii</sup> -Pb1                | 4.5583  | 4.4745   | 4.3598   | 4.2346   | 4.0673   |
| N1 <sup>vii</sup> -Pb1 <sup>i</sup>   | 5.5792  | 5.4860   | 5.4916   | 5.3761   | 5.2903   |
| N1 <sup>vii</sup> -Pb1 <sup>vii</sup> | 5.9689  | 5.8997   | 5.9493   | 5.7978   | 5.7019   |
| N1 <sup>vii</sup> -Pb1 <sup>ii</sup>  | 4.5912  | 4.4900   | 4.4780   | 4.3689   | 4.2648   |

**Table S4.** The lattice parameters of  $(\text{BA})_2\text{PbI}_4$  from high-pressure synchrotron powder XRD experiments under different hydrostatic pressures from ambient to 4.68 GPa. The errors are given in the parentheses.

| Sr | P    | a         | b         | c          | V              | alpha    | beta     | gamma    |
|----|------|-----------|-----------|------------|----------------|----------|----------|----------|
|    | GPa  | Å         |           |            | Å <sup>3</sup> | Deg.     |          |          |
| 1  | 0    | 9.1702(1) | 8.7059(3) | 28.8228(2) | 2301.0(5)      | 90       | 90       | 90       |
| 2  | 0.16 | 9.1521(2) | 8.6781(1) | 28.6733(4) | 2277.3(4)      | 90       | 90       | 90       |
| 3  | 0.31 | 9.1297(1) | 8.6440(1) | 28.4792(2) | 2247.5(4)      | 90       | 90       | 90       |
| 4  | 0.5  | 9.1002(3) | 8.6010(2) | 28.2857(3) | 2213.9(4)      | 90       | 90       | 90       |
| 5  | 0.78 | 9.0590(2) | 8.5398(3) | 28.0366(1) | 2168.9(5)      | 90       | 90       | 90       |
| 6  | 1.12 | 9.0149(1) | 8.5372(4) | 27.7440(3) | 2131.0(4)      | 88.98(1) | 87.01(1) | 91.63(1) |
| 7  | 1.43 | 8.9973(2) | 8.5336(4) | 27.6118(2) | 2114.5(3)      | 89.08(1) | 86.56(3) | 91.98(2) |
| 8  | 1.73 | 8.9825(4) | 8.5119(2) | 27.5045(4) | 2097.3(2)      | 89.22(2) | 86.46(1) | 92.07(2) |
| 9  | 2.01 | 8.9569(2) | 8.4900(2) | 27.2983(3) | 2069.4(5)      | 89.16(1) | 86.48(2) | 92.19(3) |
| 10 | 2.4  | 8.9056(3) | 8.4853(1) | 27.0376(2) | 2037.5(1)      | 89.42(3) | 86.51(1) | 92.30(2) |
| 11 | 2.9  | 8.8483(2) | 8.4367(2) | 26.7383(3) | 1990.8(3)      | 89.16(2) | 86.77(2) | 92.41(3) |
| 12 | 3.11 | 8.8187(3) | 8.4170(2) | 26.6070(2) | 1969.8(1)      | 89.07(1) | 86.77(1) | 92.38(1) |
| 13 | 3.48 | 8.7425(4) | 8.3815(4) | 26.3588(3) | 1927.0(3)      | 89.32(2) | 86.89(2) | 92.20(2) |
| 14 | 3.81 | 8.7182(3) | 8.3706(3) | 26.2317(4) | 1910.0(2)      | 89.37(1) | 86.98(1) | 92.23(3) |
| 15 | 4.24 | 8.6970(2) | 8.3533(2) | 26.1406(1) | 1894.9(1)      | 89.35(1) | 87.01(1) | 92.23(1) |
| 16 | 4.68 | 8.6751(4) | 8.3365(3) | 26.0362(2) | 1878.6(2)      | 89.34(3) | 86.91(3) | 92.20(2) |
